# Supplementary material
Source: PubMed Central journal article supplement (PMC5462038)
Supplement: supp_pp.17.00202_PP2017-RA-00202R2_Supplemental_Material.pdf [file supp_pp.17.00202_PP2017-RA-00202R2_Supplemental_Material.pdf]

```

20          40          60          80
IrcPS1  -----MASSTMHNNHSPASRRRMSAAAAAHLMPCTTITKS-AWM-NNNTENTNYC--NHK-KISVACNRYATDAPQVH 79
SmCPS1  -----MASSSSTSSPAARR-TPASA-LHHPCA-T-S-AWMSSSNLSLSTQ--NHK-KISYA---TDAPQVH 68
SmCPS2  -----MTSLS-NSRAPATSRRL-Q-TPA-LHHPSELA-W-AWNSSTPSPSTQ--RRK-HLSVTEC-RVASDEVQVSE 73
IrcPS2
SmCPS3  MSLSCILGMSLITLTPNYSYSLGEGKN-L-LSA-KLQLPQSL---T-G-TW-L-KNRETFANNO-SHRL-RKH-IL---RYLNNVAH 74
IrcPS3  -----MSSSSNNTSLRPTTAAAGPRQMRNNSCNWYSAKAGGNTNPNGNK-CYEEVHR-SRQVAAAKSRE 76
IrcPS4  -----MGLMSASNAATGRIPLTTC-VYPS-PLRKNAGGSSS--GNMK-CYGLGR-SRVAVAA-SGRT 62
SmCPS4
IrcPS5  -----MPLASNPVAVPSSSTAHGRLPAAAA-SRSSAGCQOLCRPLTPTSSQ-CNAL-SRPTEE-LIDVYONGPVIK 70
SmCPS5
IrkSL1
SmKSL1
IrkSL3
IrkSL2  -----MSTKRLPPTSTSDKQK-----S-GRTSIIIG 25
SmKSL2  -----MSLSSNSALVGPK-RSSRI-----SHASA-S 26
-----MAPPSTCIIHPKSSRR-----CSPASAAS 30

100          120          140          160          180
IrcPS1  ODDSTENQGHDAVNNI-FDPI-E-NRTITRTMGGRISVSPDTAWYALKDLNGDAPQVSSLEWYVNOQDQSGWGD-D-KKCVY 166
SmCPS1  HGTITVHQGHDAVNNI-FDPI-E-NRTITRTMGGRISVSPDTAWYAMKDLNGDAPQVSSLEWYVNOQDQSGWGD-Q-KKCVY 155
SmCPS2  HGTITVHQGHDAVNNI-FDPI-E-NRTITRTMGGRISVSPDTAWYALKDLNGDAPQVSSLEWYVNOQDQSGWGD-Q-KKCVY 158
IrcPS2
SmCPS3  EFGSTAEAVENNNI-RDMK-S-CIKLIMTKEGRISVSAATAWYALKDLNGDAPQVSSLEWYVNOQDQSGWGD-Q-HHSVY 160
IrcPS3  GNGGEPQPFQKLNQKQKML-ECITITQSGGGRISVSAATAWYALKDYVNDLPIVPSWVWVSNQVRSWGD-R-DHSPV 115
IrcPS4  H-TKPTNQDQVSSK-MRVYK-N-ETMLQNMDEGEISVSPDTAWYALVETDGR--PQPTSEWVSNQVRSWGD-R-K-KVY 157
SmCPS4  W-SN-P--E-YESK-MKEM---LWYMRDMDDGEVNSAATAWYALVETDGR--PQPTSEWVSNQVRSWGD-R-K-KVY 141
IrcPS5
SmCPS5  WH-EIVVEDDAEKDQSPK-GEERD-AVRSMRSMGGEISVSPDTAWYALVADLGR-PQPSSHWVSTNQLAGSWWGD-H-ATST 156
SmCPS5
IrkSL1
SmKSL1
IrkSL3  GR-CCQITGPRITTK-QSKIVLKRIRRSNGKVFETASADTAWYAMPSREMSGRPSPECDWVWENQNPVGSWGD-N--P- 112
IrkSL2  H-LGQRATSPONAS-MATCEETKGRARLHKNESSSTDTAWYAMPSPTSSPECPACINWVLENGCHGSWARPHHH-MKKK 116
SmKSL2  H-SGHSATSAKIAS-MPTCEETKGRARLHKNESSSTDTAWYAMPSPTSSPECPACINWVLENGCHGSWARPHHH-MKKK 120

200          220          240          260
IrcPS1  VNTACVYALRSWYHDDKIKKGTIYKENVE-KRDNNEHMTGCEVYVYALQVACGLIEDLPI-DSPFQGEVHSROOKRIPMEM 257
SmCPS1  VNTACVYALRSWYHDDKIKKGTIYKENVE-KRDNNEHMTGCEVYVYALQVACGLIEDLPI-DSPFQGEVHSROOKRIPMEM 246
SmCPS2  VNTACVYALRSWYHDDKIKKGTIYKENVE-KRDNNEHMTGCEVYVYALQVACGLIEDLPI-DSPFQGEVHSROOKRIPMEM 249
IrcPS2
SmCPS3  VNTMACVYALRSWYHDDKIKKGTIYKENVE-KRDNNEHMTGCEVYVYALQVACGLIEDLPI-DSPFQGEVHSROOKRIPMEM 247
IrcPS3  VNTACVYALRSWYHDDKIKKGTIYKENVE-KRDNNEHMTGCEVYVYALQVACGLIEDLPI-DSPFQGEVHSROOKRIPMEM 206
IrcPS4  VNTACVYALRSWYHDDKIKKGTIYKENVE-KRDNNEHMTGCEVYVYALQVACGLIEDLPI-DSPFQGEVHSROOKRIPMEM 248
SmCPS4  VNTACVYALRSWYHDDKIKKGTIYKENVE-KRDNNEHMTGCEVYVYALQVACGLIEDLPI-DSPFQGEVHSROOKRIPMEM 231
IrcPS5  ---MACVYALRSWYHDDKIKKGTIYKENVE-KRDNNEHMTGCEVYVYALQVACGLIEDLPI-DSPFQGEVHSROOKRIPMEM 86
SmCPS5  VNTACVYALRSWYHDDKIKKGTIYKENVE-KRDNNEHMTGCEVYVYALQVACGLIEDLPI-DSPFQGEVHSROOKRIPMEM 246
IrkSL1
SmKSL1  -----MSIA-EN-6
IrkSL3  SCTACVYALRSWYHDDKIKKGTIYKENVE-KRDNNEHMTGCEVYVYALQVACGLIEDLPI-DSPFQGEVHSROOKRIPMEM 201
IrkSL2  SSTACVYALRSWYHDDKIKKGTIYKENVE-KRDNNEHMTGCEVYVYALQVACGLIEDLPI-DSPFQGEVHSROOKRIPMEM 205
SmKSL2  SSTACVYALRSWYHDDKIKKGTIYKENVE-KRDNNEHMTGCEVYVYALQVACGLIEDLPI-DSPFQGEVHSROOKRIPMEM 209

280          300          320          340          360
IrcPS1  M-HXVPTSLSLEGLENLWELK-LQADGSLTSPSSATAAMQT-KDEEC-QIKNTI-ETNGGAPHTPVDYGRWAVDQ 344
SmCPS1  M-HXVPTSLSLEGLENLWELK-LQADGSLTSPSSATAAMQT-KDEEC-QIKNTI-ETNGGAPHTPVDYGRWAVDQ 333
SmCPS2  M-HXVPTSLSLEGLENLWELK-LQADGSLTSPSSATAAMQT-KDEEC-QIKNTI-ETNGGAPHTPVDYGRWAVDQ 336
IrcPS2
SmCPS3  M-HXVPTSLSLEGLENLWELK-LQADGSLTSPSSATAAMQT-KDEEC-QIKNTI-ETNGGAPHTPVDYGRWAVDQ 334
IrcPS3  L-HXKPTSLSLEGLENLWELK-LQADGSLTSPSSATAAMQT-KDEEC-QIKNTI-ETNGGAPHTPVDYGRWAVDQ 294
IrcPS4  L-HXKPTSLSLEGLENLWELK-LQADGSLTSPSSATAAMQT-KDEEC-QIKNTI-ETNGGAPHTPVDYGRWAVDQ 334
SmCPS4  L-HXKPTSLSLEGLENLWELK-LQADGSLTSPSSATAAMQT-KDEEC-QIKNTI-ETNGGAPHTPVDYGRWAVDQ 317
IrcPS5  M-HXVPTSLSLEGLENLWELK-LQADGSLTSPSSATAAMQT-KDEEC-QIKNTI-ETNGGAPHTPVDYGRWAVDQ 173
SmCPS5  M-HXVPTSLSLEGLENLWELK-LQADGSLTSPSSATAAMQT-KDEEC-QIKNTI-ETNGGAPHTPVDYGRWAVDQ 333
IrkSL1  L-RVH-PPSGH-TL-QSRGGLP-H---ES-PMITTPAAKCSITISDPMGRKRNKGRVHSPATTHSADTPSNCLIDTQR 88
SmKSL1  P-AAT-ASGN-GA-SRRRNPHTKTYVVG-FPM-NKSSAANKNTIT-TDMGR-AEKKGEVNSPAAAAQPAADTPSNCLIDTQR 93
IrkSL3  K-WEL-VGEG-GA-SGNWNOQRHQS-RN-GSINSPATAAAAHC-RHHC-DLISAM-NKNGWAPTVPMDIARCMQDTE 284
IrkSL2  S-AEKVYWAHTAEQMGKIQWESMMKQRR-NGSINSPATAAAAIAL-RNSDC-NLHHAALKKGNASAPDIDISOLCTVNE 293
SmKSL2  S-SETEVYWAHTAEQMGKIQWESMMKQRR-NGSINSPATAAAAIAL-RNSDC-NLHHAALKKGNASAPDIDISOLCTVNE 297

380          400          420          440          460
IrcPS1  GSRFEESEAECAHHTKWTENYVSGRESECDIDDTSMGRRLKMHGDVDPNLYRKK-K-DN-SCGG-QMESPSPNINRA 433
SmCPS1  GSRFEESEAECAHHTKWTENYVSGRESECDIDDTSMGRRLKMHGDVDPNLYRKK-K-DN-SCGG-QMESPSPNINRA 423
SmCPS2  GSRFEESEAECAHHTKWTENYVSGRESECDIDDTSMGRRLKMHGDVDPNLYRKK-K-DN-SCGG-QMESPSPNINRA 426
IrcPS2  GSRFEESEAECAHHTKWTENYVSGRESECDIDDTSMGRRLKMHGDVDPNLYRKK-K-DN-SCGG-QMESPSPNINRA 48
SmCPS3  GSRFEESEAECAHHTKWTENYVSGRESECDIDDTSMGRRLKMHGDVDPNLYRKK-K-DN-SCGG-QMESPSPNINRA 423
IrcPS3  GSRFEESEAECAHHTKWTENYVSGRESECDIDDTSMGRRLKMHGDVDPNLYRKK-K-DN-SCGG-QMESPSPNINRA 384
IrcPS4  GSRFEESEAECAHHTKWTENYVSGRESECDIDDTSMGRRLKMHGDVDPNLYRKK-K-DN-SCGG-QMESPSPNINRA 423
SmCPS4  GSRFEESEAECAHHTKWTENYVSGRESECDIDDTSMGRRLKMHGDVDPNLYRKK-K-DN-SCGG-QMESPSPNINRA 406
IrcPS5  GSRFEESEAECAHHTKWTENYVSGRESECDIDDTSMGRRLKMHGDVDPNLYRKK-K-DN-SCGG-QMESPSPNINRA 263
SmCPS5  GSRFEESEAECAHHTKWTENYVSGRESECDIDDTSMGRRLKMHGDVDPNLYRKK-K-DN-SCGG-QMESPSPNINRA 422
IrkSL1  GSRFEESEAECAHHTKWTENYVSGRESECDIDDTSMGRRLKMHGDVDPNLYRKK-K-DN-SCGG-QMESPSPNINRA 168
SmKSL1  GSRFEESEAECAHHTKWTENYVSGRESECDIDDTSMGRRLKMHGDVDPNLYRKK-K-DN-SCGG-QMESPSPNINRA 173
IrkSL3  GSRFEESEAECAHHTKWTENYVSGRESECDIDDTSMGRRLKMHGDVDPNLYRKK-K-DN-SCGG-QMESPSPNINRA 368
IrkSL2  GSRFEESEAECAHHTKWTENYVSGRESECDIDDTSMGRRLKMHGDVDPNLYRKK-K-DN-SCGG-QMESPSPNINRA 376
SmKSL2  GSRFEESEAECAHHTKWTENYVSGRESECDIDDTSMGRRLKMHGDVDPNLYRKK-K-DN-SCGG-QMESPSPNINRA 380

480          500          520          540
IrcPS1  SOLR-PPGEEEDANKANNQEKLA-NNOQDKWYSHKHPDEKKGMEPWATPRVEARVYQVAGSGDYWGKTLRMPESNDT 524
SmCPS1  SOLR-PPGEEEDANKANNQEKLA-NNOQDKWYSHKHPDEKKGMEPWATPRVEARVYQVAGSGDYWGKTLRMPESNDT 514
SmCPS2  SOLR-PPGEEEDANKANNQEKLA-NNOQDKWYSHKHPDEKKGMEPWATPRVEARVYQVAGSGDYWGKTLRMPESNDT 517
IrcPS2  SOLR-PPGEEEDANKANNQEKLA-NNOQDKWYSHKHPDEKKGMEPWATPRVEARVYQVAGSGDYWGKTLRMPESNDT 139
SmCPS3  SOLR-PPGEEEDANKANNQEKLA-NNOQDKWYSHKHPDEKKGMEPWATPRVEARVYQVAGSGDYWGKTLRMPESNDT 514
IrcPS3  SOLR-PPGEEEDANKANNQEKLA-NNOQDKWYSHKHPDEKKGMEPWATPRVEARVYQVAGSGDYWGKTLRMPESNDT 476
IrcPS4  SOLR-PPGEEEDANKANNQEKLA-NNOQDKWYSHKHPDEKKGMEPWATPRVEARVYQVAGSGDYWGKTLRMPESNDT 514
SmCPS4  SOLR-PPGEEEDANKANNQEKLA-NNOQDKWYSHKHPDEKKGMEPWATPRVEARVYQVAGSGDYWGKTLRMPESNDT 484
IrcPS5  SOLR-PPGEEEDANKANNQEKLA-NNOQDKWYSHKHPDEKKGMEPWATPRVEARVYQVAGSGDYWGKTLRMPESNDT 354
SmCPS5  SOLR-PPGEEEDANKANNQEKLA-NNOQDKWYSHKHPDEKKGMEPWATPRVEARVYQVAGSGDYWGKTLRMPESNDT 513
IrkSL1  ADRITTEESTKKTWTSTKQQL-TBA-PDK-KH-EQ-VG-T-LK-N-HGLRMGVRSS-DL-D-GHKTKAAAGCSN-CD 253
SmKSL1  ADRITTEESTKKTWTSTKQQL-TBA-PDK-KH-EQ-VG-T-LK-N-HGLRMGVRSS-DL-D-GHKTKAAAGCSN-CD 258
IrkSL3  SGTATTEESTKKTWTSTKQQL-TBA-PDK-KH-EQ-VG-T-LK-N-HGLRMGVRSS-DL-D-GHKTKAAAGCSN-CD 453
IrkSL2  SGTATTEESTKKTWTSTKQQL-TBA-PDK-KH-EQ-VG-T-LK-N-HGLRMGVRSS-DL-D-GHKTKAAAGCSN-CD 462
SmKSL2  SGTATTEESTKKTWTSTKQQL-TBA-PDK-KH-EQ-VG-T-LK-N-HGLRMGVRSS-DL-D-GHKTKAAAGCSN-CD 470

```

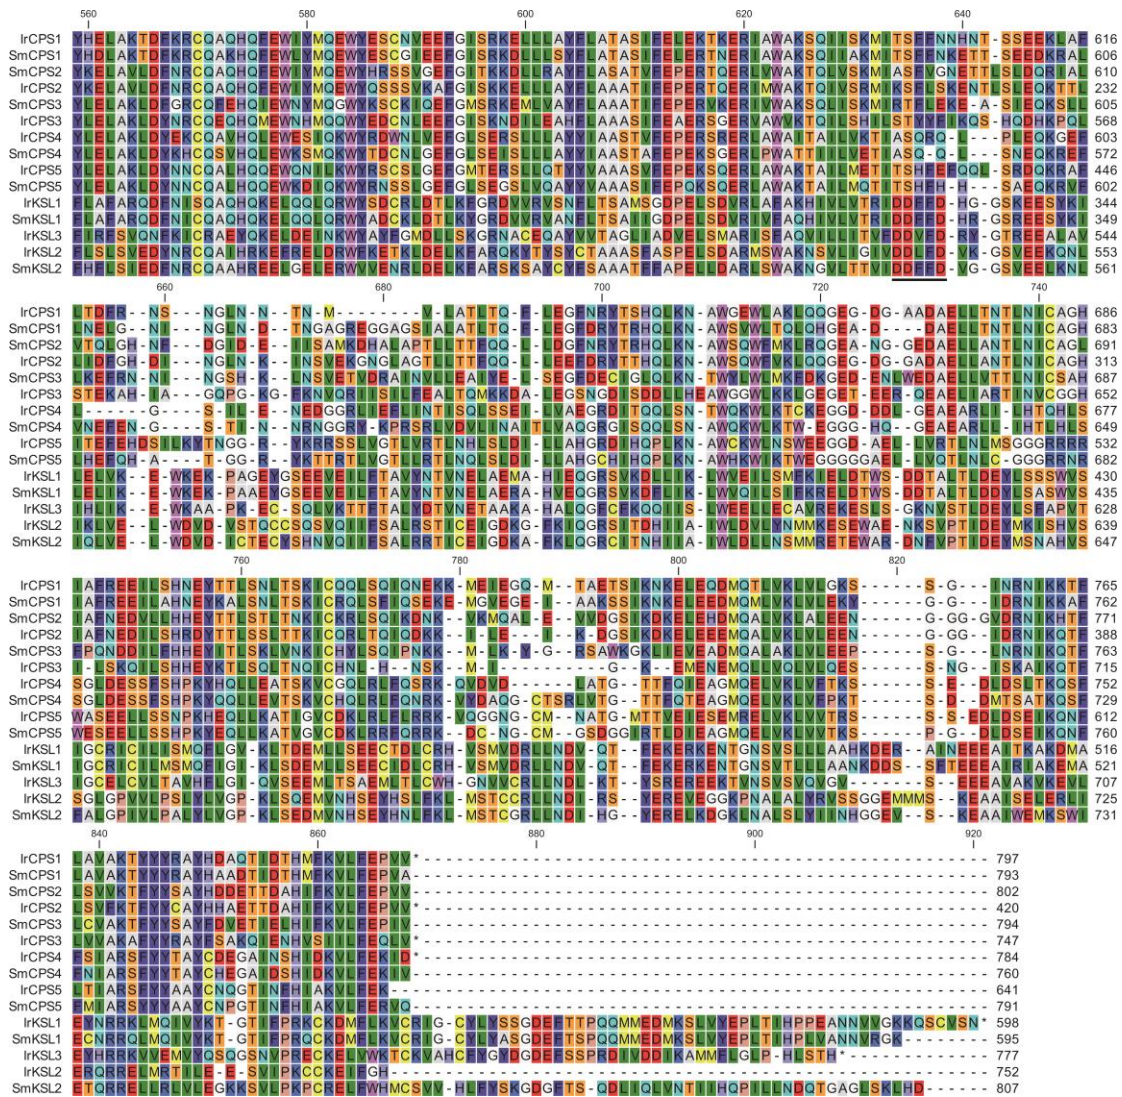

**Figure S1.** Amino acid alignment of diterpene synthase in *I. rubescens* and *S. miltiorrhiza*. The catalytic DXDD and DDXD motif was underlined. It was aligned and displayed with CLC sequence viewer 6.7.1 software.

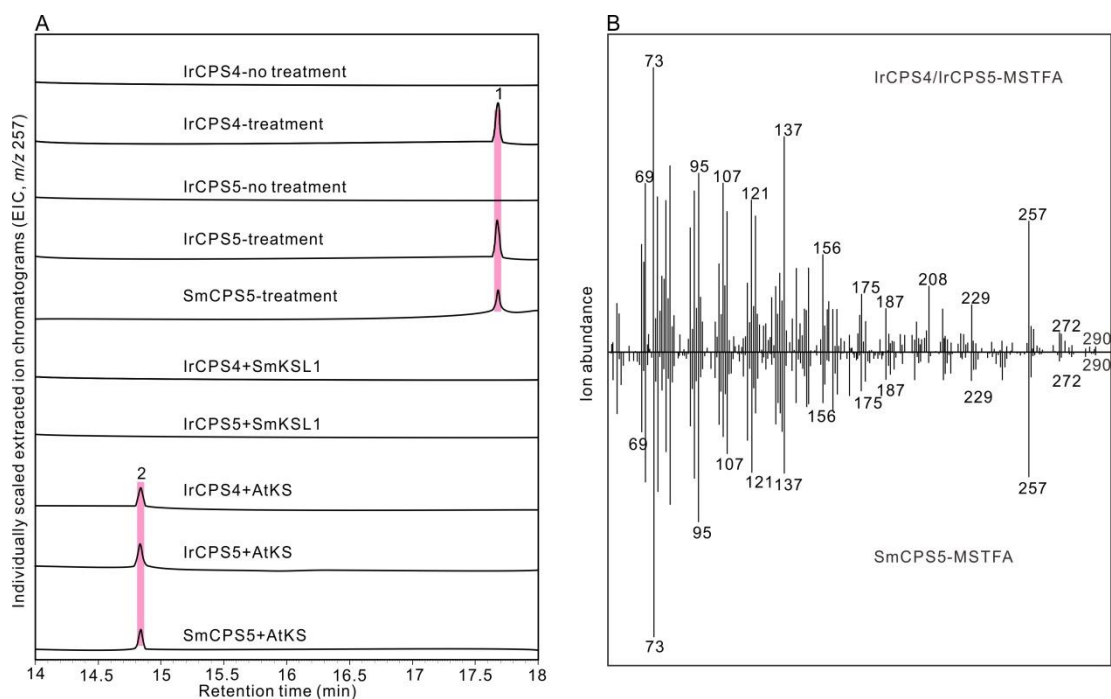

**Figure S2.** GC-MS analysis of in vitro assays of IrCPS4 and IrCPS5 on a TR-5ms capillary column

(A) EIC of  $m/z$  257 of in vitro assays with IrCPS4 and IrCPS5 alone or with combination with AtKS (specific to *ent*-CPP) and SmKSL1 (specific to normal-CPP). “Treatment” means to dephosphorylate the product of CPS with 75 U bacterial alkaline phosphatase, and further derivatized with 80  $\mu$ L N-methyl-N-(trimethylsilyl) trifluoroacetamide (MSTFA) at 80  $^{\circ}$ C for 40 minutes. (B) EI mass spectrum of the dephosphorylated product of IrCPS4 and SmCPS5 after derivatization. 1. copalol, 2. *ent*-kaurene.

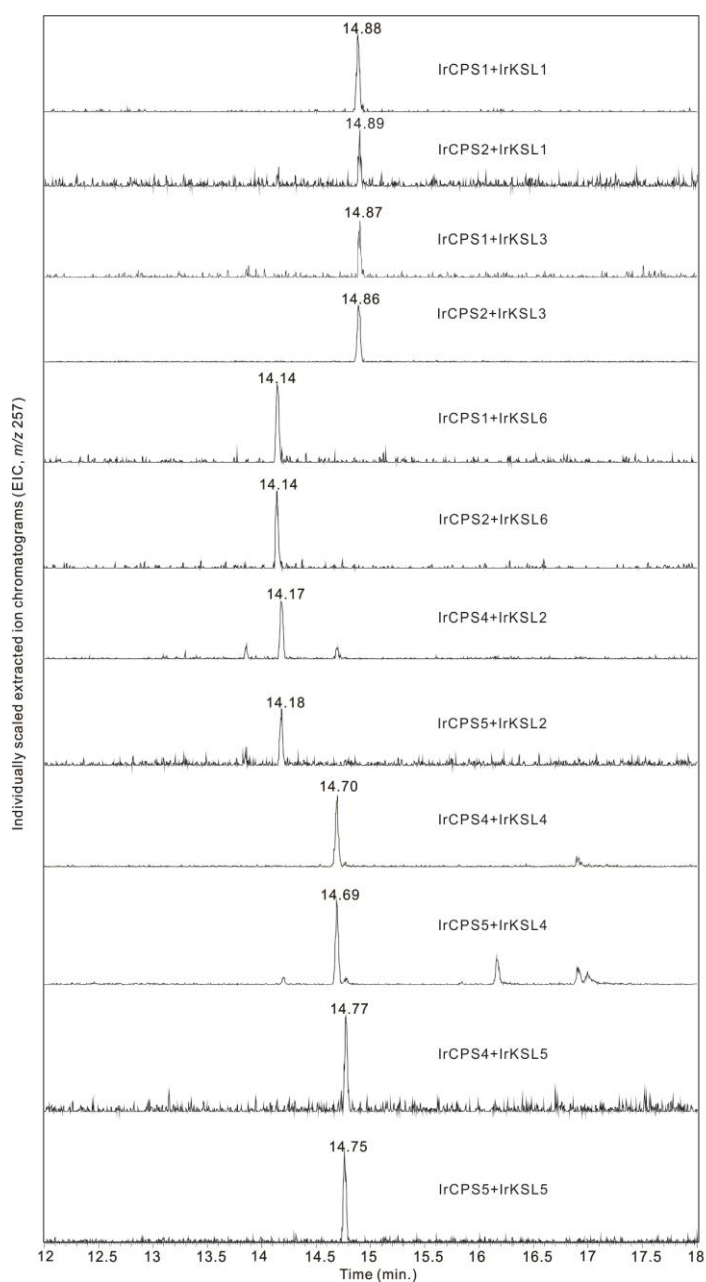

**Figure S3.** GC-MS analysis of different clade of IrKSL with the corresponding IrCPS on a TR-5ms capillary column. Extracted ion chromatograms (EIC) of  $m/z$  257 of in vitro assays of the Lamiaceae-specialized CPS clade IrCPS1 and IrCPS2 combined with IrKSL1, IrKSL3 and IrKSL6, together with the IrCPS4 and IrCPS5, which was involved in the *ent*-CPP mediated biosynthetic pathway, to combine with IrKSL2, IrKSL4 and IrKSL5.

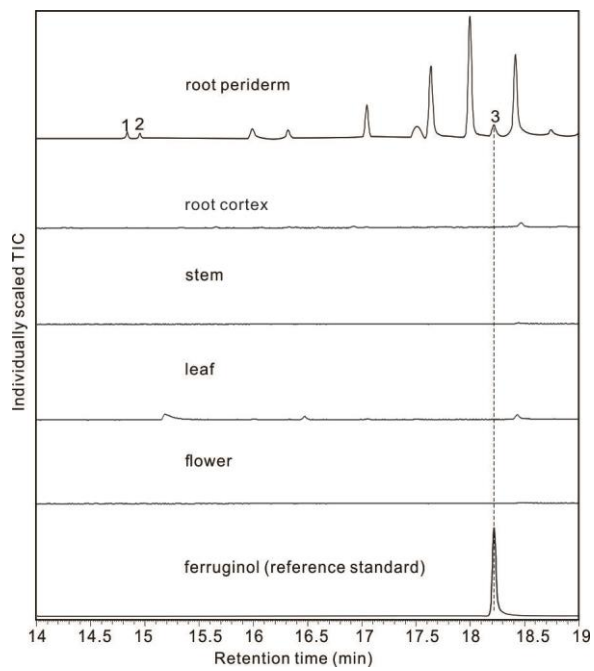

**Figure S4.** GC-MS detection of abietane diterpenoids in different organs. Total ion chromatograms (TIC) of diterpenoids in the hexane extract of the root periderm, stem, leaf, flower and the authentic standard of ferruginol. (1) abietatriene, (2) miltiradiene and (3) ferruginol.

|             |                                                                                                                           |     |
|-------------|---------------------------------------------------------------------------------------------------------------------------|-----|
| IrCYP76AH30 | ME T I A L L A A L F F I . A L T C F L T S G R R R N L P P G P Y P L P I I G N M L Q L G S N P H Q S F A Q L S K K Y G    | 59  |
| SmCYP76AH1  | M D S F P L L A A L F F I A A T I T F L S F R R R R N L P P G P F P Y P I V G N M L Q L G A N P H Q V F A K L S K R Y G   | 60  |
| RoCYP76AH22 | M D S F P L L A T L F F I L A A T W F I S F R R R R N L P P G P F P Y P I V G N M L Q L G S Q P H E T F A K L S K K Y G   | 60  |
| RoCYP76AH23 | M D S F P L L A T L F F I L A A T W F I S F R R R R N L P P G P F P Y P I V G N M L Q L G S Q P H E T F A K L S K K Y G   | 60  |
| SfCYP76AH24 | M D P F P L V A A A L F I . A A T W F I T F R R R R N L P P G P F P Y P I V G N M L Q L G S Q P H E T F A K L S K K Y G   | 59  |
| Consensus   | m l a f i a f r r r n l p p g p p i g n m l q l g p h f a l s k y g                                                       |     |
| IrCYP76AH30 | P L M S I H L G S L Y T V I V S S P E M A K E I L L H K H G Q A F S G R T I A Q A V H A C D H D K I S M G F L P V T S V W | 119 |
| SmCYP76AH1  | P L M S I H L G S L Y T V I V S S P E M A K E I L L R H G Q V F S G R T I A Q A V H A C D H D K I S M G F L P V A S E W   | 120 |
| RoCYP76AH22 | P L M S I H L G S L Y T V I V S S P E M A K E I M H K Y G Q V F S G R T V A Q A V H A C G H D K I S M G F L P V G G E W   | 120 |
| RoCYP76AH23 | P L M S I H L G S L Y T V I V S S P E M A K E I M H K Y G Q V F S G R T V A Q A V H A C G H D K I S M G F L P V G G E W   | 120 |
| SfCYP76AH24 | P L M S I H L G S L Y T V I I S S P E M A K E I M H K Y G Q V F S G R T I A Q A V H A C D H D K I S M G F L P V G A E W   | 119 |
| Consensus   | p l m s i h l g s l y t v i s s p e m a k e i h g q f s g r t a q a v h a c h d k i s m g f l p v w                       |     |
| IrCYP76AH30 | R D L R K I C K E Q M F S H Q S L E A S E G L R H Q K L Q L L D Y A Q K C E T G R A V D I R E A S F I T T L N L M S       | 179 |
| SmCYP76AH1  | R D M R K I C K E Q M F S N Q S M E A S Q G L R R Q K L Q L L D H V Q K C S D S G R A V D I R E A A F I T T L N L M S     | 180 |
| RoCYP76AH22 | R D M R K I C K E Q M F S H Q S M E D S Q G L R K Q K L Q L L D Y A Q K C S E R G R A I D I R E A A F I T T L N L M S     | 180 |
| RoCYP76AH23 | R D M R K I C K E Q M F S H Q S M E D S Q G L R K Q K L Q L L D Y A Q K C S E R G R A I D I R E A A F I T T L N L M S     | 180 |
| SfCYP76AH24 | R D M R K I C K E Q M F S H Q S M E D S O N L R K Q K L Q L L E Y A Q K C S E E G R G I D I R E A A F I T T L N L M S     | 179 |
| Consensus   | r d r k i c k e q m f s q s e s l r q k l q l l q k c g r d i r e a f i t t l n l m s                                     |     |
| IrCYP76AH30 | A T M F S T Q A T E F F S E A T K E F K E I I E G V A T I V G V P N F A D Y F P I L R P F D L Q G I K R Q A D G Y F G R   | 239 |
| SmCYP76AH1  | A T L F S S Q A T E F D S K A T M E F K E I I E G V A T I V G V P N F A D Y F P I L R P F D P Q G V K R R A D V Y F G K   | 240 |
| RoCYP76AH22 | A T L F S M Q A T E F D S K V T M E F K E I I E G V A S I V G V P N F A D Y F P I L R P F D P Q G V K R R A D V Y F G R   | 240 |
| RoCYP76AH23 | A T L F S M Q A T E F D S K V T M E F K E I I E G V A S I V G V P N F A D Y F P I L R P F D P Q G V K R R A D V Y F G R   | 240 |
| SfCYP76AH24 | A T L F S M Q A T E F D S K V T M E F K E I I E G V A S I V G V P N F A D Y F P I L R P F D P Q G V K R R A D V Y F G R   | 239 |
| Consensus   | a t f s q a t e f s t e f k e i e g v a i v g v p n f a d y f p i l r p f d q g k r a d f g                               |     |
| IrCYP76AH30 | L L K K I E G Y L N E R V E S R R L N P D A P R K N D F L E T I V V D T I E A D E Y K L T D H L T H L M L D L F V G G S   | 299 |
| SmCYP76AH1  | L L A K I E G Y L N E R L E S K R A N P N A P K K D D F L E I V V D I I Q A N E F K L K T H F T H L M L D L F V G G S     | 300 |
| RoCYP76AH22 | L L A M I E G F L N E R V E S R R T N P N A P K K D D F L E T L V D I L E A N D C K L K T D H L T H L M L D L F V G G S   | 300 |
| RoCYP76AH23 | L L A M I E G F L N E R V E S R R T N P N A P K K D D F L E T L V D I L E A N D C K L K T D H L T H L M L D L F V G G S   | 300 |
| SfCYP76AH24 | L L G L I E G Y L N E R I E F R K A N P N A P K K D D F L E T L V D A L D A K D Y K L K T B E L T H L M L D L F V G G S   | 299 |
| Consensus   | l l i e g l n e r e n p a p k d f l e v d a k l t h t h l m l d l f v g g s                                               |     |
| IrCYP76AH30 | E T N T S I E W I M S E L V I N E D K M A R V K D E I K S V V G D K K I V D E S E M P R L P Y L Q A I K E V L R I H       | 359 |
| SmCYP76AH1  | D T N T S I E W A M S E L V M N E D K M A R L K A E L K S V A G D E K I V D E S A M P K L P Y L Q A V I K E V M R I H     | 360 |
| RoCYP76AH22 | E T S T E I E W I M W E L I A H P D K M V K V K A E L K S V M G E E K V V D E S N M P R L P Y L Q A V V K E S M R L H     | 360 |
| RoCYP76AH23 | E T S T E I E W I M W E L I A H P D K M V K V K A E L K S V M G E E K V V D E S N M P R L P Y L Q A V V K E S M R L H     | 360 |
| SfCYP76AH24 | E T S T E I E W I M W E L L A S P E K M A K V K A E L K S V M G E E K V V D E S M M P R L P Y L Q A V V K E S M R L H     | 359 |
| Consensus   | t t t e w m e l p k m k e k s v g k v d e s m p r l p y l q a k e r h                                                     |     |
| IrCYP76AH30 | P P G P L L L P R R A E I D Q E V N G Y L I P K G T Q I L I N A W A T G R D P S I W K N P D S F E P E R F L D Q T V D F   | 419 |
| SmCYP76AH1  | P P G P L L L P R K A B S D Q E V N G Y L I P K G T Q I L I N A Y A T G R D P S I W T D P E T F D P E R F L D N K I D F   | 420 |
| RoCYP76AH22 | P P G P L L L P R K A B S D Q V V N G Y L I P K G T Q V L I N A W A M G R D P S I W K N P D S F E P E R F L D Q K I D F   | 420 |
| RoCYP76AH23 | P P G P L L L P R K A B S D Q V V N G Y L I P K G T Q V L I N A W A M G R D P S I W K N P D S F E P E R F L D Q K I D F   | 420 |
| SfCYP76AH24 | P P G P L L L P R K A B S D Q V V N G Y L I P K G A Q V L I N A W A M G R D P S I W K N P D S F E P E R F L D Q K I D F   | 419 |
| Consensus   | p p g p l l l p r a e d q v n g y l i p k g q l n a a g r d p s w p f e r f l d q t v d f                                 |     |
| IrCYP76AH30 | K G D Y E L I P F G S G R R I C P G M P L A N R I L H M T A T L V H N F D W K L E E E T A N . A D H Q D E L F G L A       | 478 |
| SmCYP76AH1  | K G O D Y E L L P F G S G R R V C P G M P L A T R I L H M A T A T L V H N F D W K L E D D S T A A A D H A G E L F G V A   | 480 |
| RoCYP76AH22 | K G O D Y E L I P F G S G R R V C P G M P L A N R I L H T V T A T L V H N F H W E L E R P D A S H A E H Q G V L F G F A   | 480 |
| RoCYP76AH23 | K G O D Y E L I P F G S G R R V C P G M P L A N R I L H T V T A T L V H N F H W E L E R P D A S H A E H Q G V L F G F A   | 480 |
| SfCYP76AH24 | K G T D Y E L I P F G S G R R V C P G M P L A N R I L H T V T A T L V H N F D W K L E R P E A S . D A H K G V L F G F A   | 478 |
| Consensus   | k g d e l p f g s g r r c p g m p l a r i l h t a t l v h n f w l e h l f g a                                             |     |
| IrCYP76AH30 | V R R A V P L K I I P L R P .                                                                                             | 492 |
| SmCYP76AH1  | V R R A V P L R I I P I V K S                                                                                             | 495 |
| RoCYP76AH22 | V R R A V P L K I V P F K A .                                                                                             | 494 |
| RoCYP76AH23 | V R R A V P L K I V P F K A .                                                                                             | 494 |
| SfCYP76AH24 | V R R A V P L K I V P I K A .                                                                                             | 492 |
| Consensus   | v r r a v p l i p                                                                                                         |     |

**Figure S5.** Amino acid alignment of CYP76AH30 with CYP76AH1 and CYP76AH22-24. CYP76AH1 from *S. multiorrhiza*, and CYP76AH22-24 from *Rosmarinus officinalis* and *S. fruticosa*. The three active sites involved in reciprocal activity changes from ferruginol synthase to hydroxyferruginol synthase were marked with an asterisk. It was aligned and displayed with DNAMAN.

**Table S1.** The number and length of all of the unigenes obtained by RNA-Seq

| <b>Sample</b> | <b>sequences</b> | <b>bases</b> | <b>Min</b> | <b>Max</b> | <b>Average</b> | <b>N50</b> | <b>(A+T)%</b> | <b>(C+G)%</b> |
|---------------|------------------|--------------|------------|------------|----------------|------------|---------------|---------------|
| All_unigene   | 60483            | 53581114     | 201        | 12119      | 885.89         | 1469       | 57.32         | 42.68         |

**Table S2.** Unigenes annotated as copalyl diphosphate synthase and kaurene synthase genes

| Gene_ID      | NR_protein_ID                   | Description                                                                                  | Identity | Evalue    | Score | geneLength | expected_count | FPKM  |
|--------------|---------------------------------|----------------------------------------------------------------------------------------------|----------|-----------|-------|------------|----------------|-------|
| c892_g1_i1   | gi 347546059 gb AEP03177.1      | copalyl diphosphate synthase [ <i>Isodon eriocalyx</i> ]                                     | 98.26    | 0         | 586   | 866        | 14             | 1.65  |
| c3974_g1_i1  | gi 347546057 gb AEP03176.1      | putative copalyl diphosphate synthase [ <i>I. eriocalyx</i> ]                                | 66.41    | 1.00E-43  | 157   | 359        | 3              | 0.97  |
| c5635_g1_i1  | gi 374639391 gb AEZ55684.1      | copalyl diphosphate synthase 2 [ <i>Salvia miltiorrhiza</i> ]                                | 77.63    | 0         | 577   | 1252       | 26             | 2.06  |
| c12262_g1_i1 | gi 347546057 gb AEP03176.1      | putative copalyl diphosphate synthase [ <i>I.eriocalyx</i> ]                                 | 68.57    | 5.00E-24  | 100   | 268        | 4              | 1.9   |
| c19290_g1_i1 | gi 157488863 gb ABV57835.1      | copalyl diphosphate synthase [ <i>S. miltiorrhiza</i> ]                                      | 82.32    | 0         | 1014  | 1829       | 206            | 10.96 |
| c23032_g2_i1 | gi 347546055 gb AEP03175.1      | copalyl diphosphate synthase [ <i>I. eriocalyx</i> ]                                         | 96.38    | 0         | 815   | 1284       | 172.49         | 13.31 |
| c23032_g1_i2 | gi 347546055 gb AEP03175.1      | copalyl diphosphate synthase [ <i>I. eriocalyx</i> ]                                         | 74.1     | 1.00E-125 | 385   | 936        | 97.94          | 10.6  |
| c31669_g1_i1 | gi 347546059 gb AEP03177.1      | copalyl diphosphate synthase [ <i>I. eriocalyx</i> ]                                         | 99.15    | 3.00E-76  | 245   | 353        | 3              | 1     |
| c36297_g1_i1 | gi 374639403 gb AEZ55690.1      | copalyl diphosphate synthase 4, partial [ <i>S. miltiorrhiza</i> ]                           | 83.58    | 2.00E-32  | 119   | 202        | 1              | 0.71  |
| c37986_g1_i1 | gi 157488863 gb ABV57835.1      | copalyl diphosphate synthase [ <i>S. miltiorrhiza</i> ]                                      | 57.43    | 2.00E-99  | 314   | 748        | 10             | 1.38  |
| c38849_g1_i1 | gi 359479685 ref XP_002272869.2 | PREDICTED: <i>ent</i> -copalyl diphosphate synthase, chloroplastic [ <i>Vitis vinifera</i> ] | 35.15    | 5.00E-15  | 77.4  | 451        | 10             | 2.46  |
| c44161_g1_i1 | gi 374639391 gb AEZ55684.1      | copalyl diphosphate synthase 2 [ <i>S. miltiorrhiza</i> ]                                    | 91.84    | 2.00E-59  | 199   | 296        | 2              | 0.83  |
| c7500_g1_i1  | gi 374639401 gb AEZ55689.1      | kaurene synthase 2, partial [ <i>S. miltiorrhiza</i> ]                                       | 72.95    | 2E-49     | 174   | 467        | 65             | 15.36 |
| c8557_g1_i1  | gi 374639401 gb AEZ55689.1      | kaurene synthase 2, partial [ <i>S. miltiorrhiza</i> ]                                       | 85.2     | 5.00E-118 | 364   | 900        | 41             | 4.63  |
| c9905_g1_i1  | gi 374639401 gb AEZ55689.1      | kaurene synthase 2, partial [ <i>S. miltiorrhiza</i> ]                                       | 69.41    | 3.00E-25  | 105   | 333        | 34             | 12.14 |
| c18094_g1_i1 | gi 157072589 gb ABV08817.1      | kaurene synthase [ <i>S. miltiorrhiza</i> ]                                                  | 78.69    | 0         | 937   | 2084       | 167            | 7.76  |
| c20365_g1_i2 | gi 157072589 gb ABV08817.1      | kaurene synthase [ <i>S. miltiorrhiza</i> ]                                                  | 36.23    | 2.00E-73  | 250   | 1469       | 30.87          | 2.07  |
| c20365_g1_i5 | gi 157072589 gb ABV08817.1      | kaurene synthase [ <i>S. miltiorrhiza</i> ]                                                  | 38.32    | 2.00E-78  | 262   | 1403       | 0              | 0     |
| c20365_g1_i6 | gi 157072589 gb ABV08817.1      | kaurene synthase [ <i>S. miltiorrhiza</i> ]                                                  | 36.64    | 2E-59     | 134   | 1572       | 113.32         | 7.06  |
| c21382_g1_i1 | gi 374639401 gb AEZ55689.1      | kaurene synthase 2, partial [ <i>S. miltiorrhiza</i> ]                                       | 74.3     | 9.00E-91  | 291   | 795        | 188            | 24.3  |
| c21382_g2_i1 | gi 374639401 gb AEZ55689.1      | kaurene synthase 2, partial [ <i>S. miltiorrhiza</i> ]                                       | 58.09    | 6E-74     | 251   | 1097       | 29.46          | 2.69  |
| c21382_g2_i2 | gi 374639401 gb AEZ55689.1      | kaurene synthase 2, partial [ <i>S. miltiorrhiza</i> ]                                       | 65.55    | 0         | 524   | 1624       | 97.99          | 5.9   |
| c21382_g2_i3 | gi 374639401 gb AEZ55689.1      | kaurene synthase 2, partial [ <i>S. miltiorrhiza</i> ]                                       | 67.06    | 9.00E-176 | 518   | 1231       | 112.36         | 9.06  |
| c21382_g2_i4 | gi 374639401 gb AEZ55689.1      | kaurene synthase 2, partial [ <i>S. miltiorrhiza</i> ]                                       | 71.35    | 1.00E-74  | 245   | 552        | 2.64           | 0.51  |



|              |                            |                                                              |       |           |      |      |        |       |
|--------------|----------------------------|--------------------------------------------------------------|-------|-----------|------|------|--------|-------|
| c21382_g2_i6 | gi 374639401 gb AEZ55689.1 | kaurene synthase 2, partial [ <i>S. miltiorrhiza</i> ]       | 69.25 | 0         | 700  | 1523 | 299.59 | 19.31 |
| c21382_g2_i8 | gi 374639401 gb AEZ55689.1 | kaurene synthase 2, partial [ <i>S. miltiorrhiza</i> ]       | 80.95 | 0         | 742  | 1317 | 146.97 | 11.04 |
| c30148_g1_i1 | gi 29825615 gb AAO92305.1  | <i>ent</i> -kaurene synthase [ <i>Nicotiana sylvestris</i> ] | 50.71 | 3.00E-29  | 110  | 384  | 7      | 2.09  |
| c33438_g1_i1 | gi 157072589 gb ABV08817.1 | kaurene synthase [ <i>S. miltiorrhiza</i> ]                  | 44.32 | 2.00E-100 | 318  | 1269 | 25     | 1.95  |
| c40624_g1_i1 | gi 157072589 gb ABV08817.1 | kaurene synthase [ <i>S. miltiorrhiza</i> ]                  | 40.35 | 1.00E-19  | 89.4 | 355  | 3      | 0.99  |

**Table S3.** Information of diTPS gene family in *I. rubescens*

| Gene | Accession No. | Length    |             | Function annotation                         |
|------|---------------|-----------|-------------|---------------------------------------------|
|      |               | cDNA (bp) | Protein(aa) |                                             |
| CPS1 | KU180499      | 2391      | 796         | copalyl diphosphate synthase                |
| CPS2 | KU180500      | 2400      | 799         | copalyl diphosphate synthase                |
| CPS3 | KU180501      | 2241      | 746         | unknown                                     |
| CPS4 | KU180502      | 2352      | 783         | <i>ent</i> -copalyl diphosphate synthase    |
| CPS5 | KU180503      | 2454      | 817         | <i>ent</i> -copalyl diphosphate synthase    |
| KSL1 | KU180504      | 1794      | 597         | miltiradiene synthase/manoyl oxide synthase |
| KSL2 | KU180505      | 2382      | 793         | <i>ent</i> -isopimaradiene synthase         |
| KSL3 | KU180506      | 2331      | 776         | miltiradiene synthase/manoyl oxide synthase |
| KSL4 | KX580633      | 2421      | 806         | <i>ent</i> -atisrene synthase               |
| KSL5 | KX580634      | 2385      | 794         | <i>ent</i> - kaurene synthase               |
| KSL6 | KX580635      | 2328      | 775         | isopimaradiene synthase                     |

**Table S4.** Blast result of genes identified from this paper to the reference transcriptome sequencing dataset (Zerbe et al. 2013)

| Query genes | seq. in reference                | Score            | Expect   | Identities      |
|-------------|----------------------------------|------------------|----------|-----------------|
| IrCPS1*     | IRL_24072012_comp91626_c0_seq8   | 4668 bits (2355) | 0        | 2382/2391(99)   |
| IrCPS2      | IRL_24072012_comp91626_c0_seq8   | 363 bits (183)   | 3.00E-98 | 527/641 (82%)   |
| IrCPS3      | IRL_24072012_comp82593_c0_seq1   | 4349 bits (2194) | 0        | 2231/2242 (99%) |
|             | IRL_24072012_comp97718_c1_seq26  | 2759 bits (1392) | 0        | 1431/1444 (99%) |
| IrCPS4      | IRL_24072012_comp78356_c3_seq1   | 763 bits (385),  | 0        | 394/397 (99%)   |
|             | IRL_24072012_comp97718_c1_seq35  | 759 bits (383)   | 0        | 383/383 (100%)  |
| IrCPS5      | IRL_24072012_comp62394_c0_seq1   | 2123 bits (1071) | 0        | 1074/1075 (99%) |
|             | IRL_24072012_comp1867024_c0_seq1 | 519 bits (262)   | e-145    | 268/270 (99%)   |
| IrKSL1*     | IRL_24072012_comp96546_c0_seq4   | 3503 bits (1767) | 0        | 1789/1795 (99%) |
| IrKSL2      | IRL_24072012_comp98782_c3_seq4   | 1877 bits (947)  | 0        | 1193/1275 (93%) |
| IrKSL3*     | IRL_24072012_comp87946_c0_seq1   | 4409 bits (2224) | 0        | 2307/2334 (98%) |
| IrKSL4      | IRL_24072012_comp98782_c3_seq4   | 2305 bits (1163) | 0        | 1467/1569 (93%) |
| IrKSL5      | IRL_24072012_comp98782_c3_seq2   | 2282 bits (1151) | 0        | 1773/1977 (89%) |
| IrKSL6      | IRL_24072012_comp833254_c0_seq1  | 345 bits (174)   | 6.00E-93 | 181/182 (99%)   |

\* indicate genes with the full length in the reference dataset (Zerbe et al., 2013).

**Table S5. List of plant DiTPS involved in this paper**

| Gene    | Species                     | GenBank<br>Accession | Funtional Annotation*                      | Ref.                          |
|---------|-----------------------------|----------------------|--------------------------------------------|-------------------------------|
| AgAS    | <i>Abies grandis</i>        | AAB05407             | abietadiene synthase                       | Vogel et al.,1996             |
| AbCAS   | <i>Abies balsamea</i>       | AEL99953             | cis-abienol synthase                       | Zerbe et al., 2012            |
| AtCPS   | <i>Arabidopsis thaliana</i> | AAA53632             | ent-copalylidiphosphatesynthas             | Sun et al., 1994              |
| AtKSL   | <i>A. thaliana</i>          | AAC39443             | ent-kaurene synthase                       | Yamaguchi et al., 1998        |
| CcCLS   | <i>Cistus creticus</i>      | ADJ93862             | copal-8-ol diphosphate synthase            | Falara et al., 2010           |
| CfTPS1  | <i>Coleus forskohlii</i>    | KF444506             | copalylidiphosphate synthase               | Pateraki et al., 2014         |
| CfTPS14 | <i>C. forskohlii</i>        | AGN70881             | ent-kaurene synthase                       | Zerbe et al., 2013            |
| CfTPS2  | <i>C. forskohlii</i>        | KF444507             | copal-8-ol diphosphate synthase            | Pateraki et al., 2014         |
| CfTPS3  | <i>C. forskohlii</i>        | KF444508             | (13R) manoyl oxide synthase                | Pateraki et al., 2014         |
| CfTPS4  | <i>C. forskohlii</i>        | KF444509             | miltiradiene synthase                      | Pateraki et al., 2014         |
| CmCPS1  | <i>Cucurbita maxima</i>     | AAD04292             | ent-copalylidiphosphate synthase           | Smith et al.,1998             |
| CmCPS2  | <i>C. maxima</i>            | AAD04293             | ent-copalylidiphosphate synthase           | Smith et al.,1998             |
| CmKS    | <i>C. maxima</i>            | AAB39482             | ent-kaurene synthase                       | Yamaguchi et al., 1996        |
| EpTPS1  | <i>Euphorbia peplus</i>     | KC702395             | ent-kaurene synthase                       | Zerbe et al., 2013            |
| EpTPS23 | <i>E. peplus</i>            | KP889108             | <i>Class I diTPS</i>                       | Andersen-Ranberg et al., 2016 |
| EpTPS7  | <i>E. peplus</i>            | AGN70883             | ent-copalylidiphosphate synthase           | Zerbe et al., 2013            |
| EpTPS8  | <i>E. peplus</i>            | KP889107             | <i>Class I diTPS</i>                       | Andersen-Ranberg et al., 2016 |
| GbLS    | <i>Ginkgo biloba</i>        | AAL09965             | levopimaradiene synthase                   | Schepmann et al., 2001        |
| GrTPS1  | <i>Grindelia robusta</i>    | AGN70886             | 13-labden-8,15-diol pyrophosphate synthase | Zerbe et al., 2013            |
| GrTPS2  | <i>G. robusta</i>           | KR089902             | labda-7,13E-dienyl diphosphate synthase    | Zerbe et al., 2015            |
| GrTPS4  | <i>G. robusta</i>           | KR089903             | ent-kaurene synthase                       | Zerbe et al., 2015            |
| GrTPS6  | <i>G. robusta</i>           | AGN70887             | manoyl oxide                               | Zerbe et al., 2013            |
| HvCPS   | <i>Hordeum vulgare</i>      | AAT49065             | ent-copalylidiphosphate synthase           | Spielmeyer et al., 2004       |
| HvKSL1  | <i>H. vulgare</i>           | AAT49066             | ent-kaurene synthase                       | Spielmeyer et al., 2004       |
| IeCPS1  | <i>Isodon eriocalyx</i>     | AEP03177             | ent-copalylidiphosphate synthase           | Li et al., 2012               |
| IeCPS2  | <i>I. eriocalyx</i>         | AEP03175             | ent-copalylidiphosphate synthase           | Li et al., 2012               |
| LsCPS   | <i>Lactuca sativa</i>       | BAB12440             | ent-kaurene synthase                       | Sawada et al., 2008           |

|          |                              |              |                                                      |                              |
|----------|------------------------------|--------------|------------------------------------------------------|------------------------------|
| LsKS     | <i>L. sativa</i>             | BAB12441     | <i>ent</i> -kaurene synthase                         | Sawada et al., 2008          |
| MvCPS1   | <i>Marrubium vulgare</i>     | KJ584450     | peregrinol diphosphate synthase                      | Zerbe et al., 2014           |
| MvCPS3   | <i>M. vulgare</i>            | KJ584452     | copalyl diphosphate synthase                         | Zerbe et al., 2014           |
| MvEKS    | <i>M. vulgare</i>            | KJ584453     | <i>ent</i> -kaurene synthase                         | Zerbe et al., 2014           |
| MvELS    | <i>M. vulgare</i>            | KJ584454     | 9,13-epoxy-labd-14-en synthase                       | Zerbe et al., 2014           |
| NtABS    | <i>Nicotiana tabacum</i>     | CD33019      | cis-abienol synthase                                 | Sallaud et al., 2012         |
| NtCPS2   | <i>N. tabacum</i>            | CCD33018     | copal-8-ol diphosphate synthase                      | Sallaud et al., 2012         |
| OsCPS1   | <i>Oryza sativa</i>          | BAD42449     | <i>ent</i> -copalyldiphosphate synthase              | Otomo et al., 2004           |
| OsCPS2   | <i>O. sativa</i>             | AAT11021     | <i>ent</i> -copalyldiphosphate synthase              | Prisic et al., 2004          |
| OsCPS4   | <i>O. sativa</i>             | AAS98158     | <i>syn</i> -copalyldiphosphate synthase              | Xu et al., 2004              |
| OsKLS8   | <i>O. sativa</i>             | Q6BDZ9       | stemar-13-ene synthase                               | Nemoto et al., 2004          |
| OsKS1    | <i>O. sativa</i>             | AAQ72559     | <i>ent</i> -kaurene synthase                         | Margis-Pinheiro et al., 2005 |
| OsKSL10  | <i>O. sativa</i>             | Q2QQJ5       | <i>ent</i> -sandaracopimara-8(14),15-diene synthase  | Peters. 2006                 |
| OsKSL11  | <i>O. sativa</i>             | Q1AHB2       | stemod-13(17)-ene synthase                           | Morrone et al., 2006         |
| OsKSL4   | <i>O. sativa</i>             | AAU05906     | pimara-7,15-diene synthase                           | Wilderman et al., 2004       |
| OsKSL5   | <i>O. sativa</i>             | Q6Z5J6       | <i>ent</i> -pimara-8(14),15-diene synthase           | Margis-Pinheiro et al., 2005 |
| OsKSL6   | <i>O. sativa</i>             | A4KAG8       | <i>ent</i> -isokaur-15-ene synthase                  | Xu et al., 2007              |
| OsKSL7   | <i>O. sativa</i>             | BAC56714     | <i>ent</i> -cassa-12,15-diene synthase               | Cho et al., 2004             |
| PaIso    | <i>Picea abies</i>           | AAS47690     | isopimaradiene synthase                              | Martin et al., 2004          |
| PaLAS    | <i>P. abies</i>              | AAS47691     | levopimaradiene/abietadiene synthase                 | Martin et al., 2004          |
| PgCPS    | <i>P. glauca</i>             | ADB55707     | <i>ent</i> -copalyldiphosphate synthase              | Keeling et al., 2010         |
| PgKS     | <i>P. glauca</i>             | ADB55708     | <i>ent</i> -kaurene synthase                         | Keeling et al., 2010         |
| PpCPS/KS | <i>Physcomitrella patens</i> | BAF61135     | <i>ent</i> -kaurene synthase                         | Hayashi et al., 2006         |
| PsaCPS   | <i>Pisum sativum</i>         | AAB58822     | Bifunctional <i>ent</i> -copalyldiphosphate synthase | Ait-Ali et al., 1997         |
| PsCPS    | <i>P. sitchensis</i>         | ADB55709     | <i>ent</i> -copalyldiphosphate synthase              | Keeling et al., 2010         |
| PsIso    | <i>P. sitchensis</i>         | ADZ45512     | Isopimaradiene synthase                              | Keeling et al., 2011         |
| PsKS     | <i>P. sitchensis</i>         | ADB55710     | <i>ent</i> -kaurene synthase                         | Keeling et al., 2010         |
| PsLAS    | <i>P. sitchensis</i>         | ADZ45517     | Levopimaradiene/abietadiene synthase                 | Keeling et al., 2011         |
| PtKS     | <i>Populus trichocarpa</i>   | XP_002311286 | <i>ent</i> -kaurene synthase                         | Tuskan et al., 2006          |

|         |                                   |          |                                           |                               |
|---------|-----------------------------------|----------|-------------------------------------------|-------------------------------|
| RcKSL1  | <i>Ricinus communis</i>           |          | <i>ent</i> -kaurene synthase              | Jackson et al., 2014          |
| RcKSL2  | <i>R. communis</i>                |          | <i>ent</i> -trachylobane synthase         | Jackson et al., 2014          |
| RcKSL3  | <i>R. communis</i>                |          | <i>ent</i> -sandaracopimaradiene synthase | Jackson et al., 2014          |
| RcKSL4  | <i>R. communis</i>                |          | <i>ent</i> -beyerene synthase             | Jackson et al., 2014          |
| RoCPS1  | <i>Rosmarinus officinalis</i>     | KF805857 | copalyl diphosphate synthase              | Brückner et al., 2014         |
| RoKSL1  | <i>R. officinalis</i>             | KF805858 | multiradiene synthase                     | Brückner et al., 2014         |
| RoKSL2  | <i>R. officinalis</i>             | KF805859 | multiradiene synthase                     | Brückner et al., 2014         |
| SdCPS   | <i>Scoparia dulcis</i>            | BAD91286 | <i>ent</i> -copalyldiphosphate synthase   | Nakagiri et al., 2005         |
| ShSBS   | <i>S. habrochaites</i>            | B8XA41   | santalene and bergamotene synthase        | Sallaud et al., 2009          |
| SIPHS   | <i>Solanum lycopersicum</i>       | ACO56896 | phellandrene synthase                     | Schillmiller et al., 2009     |
| SITPS14 | <i>S. lycopersicum</i>            | JN412091 | <i>ent</i> -kaurene synthase              | Falara et al., 2011           |
| SITPS40 | <i>S. lycopersicum</i>            | JN412074 | <i>ent</i> -copalyldiphosphate synthase   | Falara et al., 2011           |
| SmCPS1  | <i>S. miltiorrhiza</i>            | KC814639 | copalyl diphosphate synthase              | Gao et al., 2009              |
| SmCPS2  | <i>S. miltiorrhiza</i>            | KC814640 | copalyl diphosphate synthase              | Cui et al., 2015              |
| SmCPS3  | <i>S. miltiorrhiza</i>            | KC814641 | No function                               | Cui et al., 2015              |
| SmCPS4  | <i>S. miltiorrhiza</i>            | KP063138 | labd-13-en-8-ol diphosphate synthase      | Cui et al., 2015              |
| SmCPS5  | <i>S. miltiorrhiza</i>            | KC814642 | <i>ent</i> -copalyldiphosphate synthase   | Cui et al., 2015              |
| SmKSL1  | <i>S. miltiorrhiza</i>            | ABV08817 | multiradiene synthase                     | Gao et al., 2009              |
| SmKSL2  | <i>S. miltiorrhiza</i>            | KC814643 | <i>ent</i> -kaurene synthase              | Cui et al., 2015              |
| SmMDS   | <i>Selaginella moellendorffii</i> | AB668998 | multiradiene synthase                     | Sugai et al., 2011            |
| SrCPS   | <i>Stevia rebaudiana</i>          | AAB87091 | <i>ent</i> -copalyldiphosphate synthase   | Richman et al., 1999          |
| SrKS1   | <i>S. rebaudiana</i>              | AAD34294 | <i>ent</i> -kaurene synthase              | Richman et al., 1999          |
| SrKS2   | <i>S. rebaudiana</i>              | AAD34295 | <i>ent</i> -kaurene synthase              | Richman et al., 1999          |
| SsLPS   | <i>Salvia sclarea</i>             | AET21247 | copal-8-ol diphosphate synthase           | Schalk et al., 2012           |
| SsScS   | <i>S. sclarea</i>                 | AET21246 | sclareol synthase                         | Schalk et al., 2012           |
| TaKSL5  | <i>Triticum aestivum</i>          | BAL41692 | nerolidol synthase                        | Hillwig et al., 2011          |
| TcTS    | <i>Taxus brevifolia</i>           | AAC49310 | taxadiene synthase                        | Wildung and Croteau. 1996     |
| TwTPS14 | <i>Tripterygium Wilfordii</i>     | KP889111 | <i>Class II diTPS</i>                     | Andersen-Ranberg et al., 2016 |
| TwTPS2  | <i>T. Wilfordii</i>               | KP889109 | <i>Class I diTPS</i>                      | Andersen-Ranberg et al., 2016 |

|         |                     |              |                                  |                               |
|---------|---------------------|--------------|----------------------------------|-------------------------------|
| TwTPS21 | <i>T. Wilfordii</i> | KP889112     | Class II diTPS                   | Andersen-Ranberg et al., 2016 |
| TwTPS28 | <i>T. Wilfordii</i> | KP889113     | Class II diTPS                   | Andersen-Ranberg et al., 2016 |
| TwTPS7  | <i>T. Wilfordii</i> | KP889110     | Class I diTPS                    | Andersen-Ranberg et al., 2016 |
| ZmAn1   | <i>Zea mays</i>     | AAA73960     | ent-copalyl diphosphate synthase | Bensen et al., 1995           |
| ZmAn2   | <i>Z. mays</i>      | AAT70083     | ent-copalyl diphosphate synthase | Bensen et al., 1995           |
| ZmTPS1  | <i>Zea mays</i>     | NP_001105097 | sesquiterpene synthase           | Schnee et al., 2002           |
| SfCPS   | <i>S. fruticosa</i> | KP091840     | copalyl diphosphate synthase     | Božić et al., 2015            |
| SfKSL   | <i>S. fruticosa</i> | KP091841     | multiradiene synthase            | Božić et al., 2015            |
| SdCPS1  | <i>S. divinorum</i> | KX424876     | ent-copalyl diphosphate synthase | Pelot et al., 2017            |
| SdCPS2  | <i>S. divinorum</i> | KX424877     | clerodienyl diphosphate          | Pelot et al., 2017            |
| SdKSL1  | <i>S. divinorum</i> | KY057342     | ent-kaurene synthase like        | Pelot et al., 2017            |

\*Functional annotation is based on the main terpenoid product(s) of recombinant enzymes expressed in *E. coli*. Many TPSs produced multiple products.

### Supplemental References

- Ait-Ali T, Swain SM, Reid JB, Sun TP, Kamiya Y. (2003). The LS locus of pea encodes the gibberellin biosynthesis enzyme *ent*-kaurene synthase A. *Plant J.* 11(3): 443-454.
- Bensen RJ, Johal GS, Crane VC, Tossberg JT, Schnable PS, Meeley RB, Briggs SP. (1995). Cloning and characterization of the maize An1 gene. *Plant Cell* 7(1): 75-84.
- Andersen-Ranberg J, Kongstad KT, Nielsen MT, Jensen NB, Pateraki I, Bach SS, Hamberger B, Zerbe P, Staerk D, Bohlmann J, Moler BL, and Hamberger B. (2016). Expanding the landscape of diterpene structural diversity through stereochemically controlled combinatorial biosynthesis. *Angew. Chem. Int. Ed.* 55:1-6.
- Božić D, Papaefthimiou D, Brückner K, de Vos RC, Tsoledis CA, Katsarou D, Papanikolaou A, Pateraki I, Chatzopoulou FM, Dimitriadou E, et al.** (2015). Towards elucidating carnosic acid biosynthesis in Lamiaceae: functional characterization of the three first steps of the pathway in *Salvia fruticosa* and *Rosmarinus officinalis*. *Plos One* **10**: e0124106
- Brückner K, Bozic D, Manzano D, Papaefthimiou D, Pateraki I, Scheler U, Ferrer A, de Vos RC, Kanellis AK, Tissier A. (2014). Characterization of two genes for the biosynthesis of abietane-type diterpenes in rosemary (*Rosmarinus officinalis*) glandular trichomes. *Phytochemistry* 101, 52-64.
- Cho EM, Okada A, Kenmoku H, Otomo K, Toyomasu T, Mitsuhashi W, Sassa T, Yajima A, Yabuta G, Mori K, Oikawa H, Toshima H, Shibuya N, Nojiri H, Omori T, Nishiyama M, Yamane H. (2004). Molecular cloning and characterization of a cDNA encoding *ent*-cassa-12, 15-diene synthase, a putative diterpenoid phytoalexin biosynthetic enzyme, from suspension-cultured rice cells treated with a chitin elicitor. *Plant J.* 37(1): 1-8.
- Falara V, Pichersky E, Kanellis AK. (2010). A copal-8-ol diphosphate synthase from the angiosperm *Cistus creticus* subsp. *creticus* is a putative key enzyme for the formation of pharmacologically active, oxygen-containing labdane-type diterpenes. *Plant physiol* 154(1): 301-310.
- Falara V, Akhtar TA, Nguyen TT, Spyropoulou EA, Bleeker PM, Schauvinhold I, Pichersky E. (2011). The tomato terpene synthase gene family. *Plant physiol* 157(2): 770-789.

- Gao W, Hillwig ML, Huang L, Cui G, Wang X, Kong JQ, Yang B, Peters RJ. (2009). A functional genomics approach to tanshinone biosynthesis provides stereochemical insights. *Org Lett* 11(22): 5170-5173.
- Hayashi KI, Kawaide H, Notomi M, Sakigi Y, Matsuo A, Nozaki H. (2006). Identification and functional analysis of bifunctional *ent*-kaurene synthase from the moss *Physcomitrella patens*. *FEBS Lett* 580(26): 6175-6181.
- Hillwig ML, Xu M, Toyomasu T, Tiernan MS, Wei G, Cui G, Huang LQ, Peters RJ. (2011). Domain loss has independently occurred multiple times in plant terpene synthase evolution. *Plant J.* 68(6): 1051-1060.
- Jackson AJ, Hershey DM, Chesnut T, Xu MM, Peters RJ. (2014). Biochemical characterization of the castor bean *ent*-kaurene synthase(-like) family supports quantum chemical view of diterpene cyclization. *Phytochemistry* 103:13-21.
- Keeling CI, Dullat HK, Yuen M, Ralph SG, Jancsik S, Bohlmann J. (2010). Identification and functional characterization of monofunctional *ent*-copalyl diphosphate and *ent*-kaurene synthases in white spruce reveal different patterns for diterpene synthase evolution for primary and secondary metabolism in gymnosperms. *Plant Physiol* 152(3): 1197-1208.
- Keeling CI, Weisshaar S, Ralph SG, Jancsik S, Hamberger B, Dullat HK, Bohlmann J. (2011). Transcriptome mining, functional characterization, and phylogeny of a large terpene synthase gene family in spruce (*Picea* spp.). *BMC Plant Boil* 11(1): 43.
- Li JL, Chen QQ, Jin QP, Gao J, Zhao PJ, Lu S, Zeng Y. (2012). IeCPS2 is potentially involved in the biosynthesis of pharmacologically active *Isodon* diterpenoids rather than gibberellin. *Phytochemistry* 76: 32-39.
- Margis-Pinheiro M, Zhou XR, Zhu QH, Dennis ES, Upadhyaya NM. (2005). Isolation and characterization of a Ds-tagged rice (*Oryza sativa* L.) GA-responsive dwarf mutant defective in an early step of the gibberellin biosynthesis pathway. *Plant Cell Rep* 23(12): 819-833.
- Martin DM, Fäldt J, Bohlmann J. (2004). Functional characterization of nine Norway spruce TPS genes and evolution of gymnosperm terpene synthases of the TPS-d subfamily. *Plant Physiol* 135(4): 1908-1927.
- Morrone D, Jin Y, Xu M, Choi SY, Coates RM, Peters RJ. (2006). An unexpected diterpene cyclase from rice: functional identification of a stemodene synthase. *Arch. Biochem. Biophys* 448 (1-2):133-140.
- Nakagiri T, Lee JB, Hayashi T. (2005). cDNA cloning, functional expression and characterization of *ent*-copalyl diphosphate synthase from *Scoparia dulcis* L. *Plant Sci* 169(4): 760-767.
- Nemoto T, Cho EM, Okada A, Okada K, Otomo K, Kanno Y, Toyomasu T, Mitsuhashi W, Sassa T, Minami E, Shibuya N, Nishiyama M, Nojiri H, Yamane H. (2004) Stemar-13-ene synthase, a diterpene cyclase involved in the biosynthesis of the phytoalexin oryzalexin S in rice. *FEBS Lett* 571 (1-3): 182-186.
- Otomo K, Kenmoku H, Oikawa H, König WA, Toshima H, Mitsuhashi W, Yamane H, Sassa T, Toyomasu T. (2004). Biological functions of *ent*- and *syn*-copalyl diphosphate synthases in rice: key enzymes for the branch point of gibberellin and phytoalexin biosynthesis. *Plant J* 39(6): 886-893.
- Pateraki I, Andersen-Ranberg J, Hamberger B, Heskes AM, Martens HJ, Zerbe P, Bach SS, Møller BL, Bohlmann J, Hamberger B. (2014). Manoyl oxide (13R), the biosynthetic precursor of forskolin, is synthesized in specialized root cork cells in *Coleus forskohlii*. *Plant Physiol* 164: 1222-1236.
- Pelot KA, Mitchell R, Kwon M, Hagelthorn DM, Wardman JF, Chiang A, Bohlmann J, Ro DK, Zerbe P.** (2017). Biosynthesis of the psychotropic plant diterpene salvinatorin A: Discovery and characterization of the *Salvia divinorum* clerodienyl diphosphate synthase. *Plant J* **89**:885-897.
- Prisic S, Xu M, Wilderman PR, Peters RJ. (2004). Rice contains two disparate *ent*-copalyl diphosphate synthases with distinct metabolic functions. *Plant Physiol* 136(4): 4228-4236.



- Peters, R. J.(2006) Uncovering the complex metabolic network underlying diterpenoid phytoalexin biosynthesis in rice and other cereal crop plants. *Phytochemistry* 67 (21):2307-2317.
- Richman AS, Gijzen M, Starratt AN, Yang Z, Brandle JE. (1999). Diterpene synthesis in *Stevia rebaudiana*: recruitment and up - regulation of key enzymes from the gibberellin biosynthetic pathway. *Plant J* 19(4): 411-421.
- Sallaud C, Rontein D, Onillon S, Jabes F, Duffe P, Giacalone C, Thoraval S, Escoffier C, Herbette G, Leonhardt N, Causse M, Tissier A. (2009). A novel pathway for sesquiterpene biosynthesis from Z, Z-farnesyl pyrophosphate in the wild tomato *Solanum habrochaites*. *Plant Cell* 21 (1):301-317.
- Sallaud C, Giacalone C, Töpfer R, Goepfert S, Bakaher N, Rösti S, Tissier A. (2012). Characterization of two genes for the biosynthesis of the labdanediterpene Z - abienol in tobacco (*Nicotiana tabacum*) glandular trichomes. *Plant J* 72(1): 1-17.
- Sawada Y, Katsumata T, Kitamura J, Kawaide H, Nakajima M, Asami T, Nakaminami K, Kurahashi T, Mitsuhashi W, Inoue Y, Toyomasu T. (2008).Germination of photoblastic lettuce seeds is regulated via the control of endogenous physiologically active gibberellin content, rather than of gibberellin responsiveness. *J Exp Bot* 59 (12), 3383-3393.
- Schalk M, Pastore L, Mirata MA, Khim S, Schouwey M, Deguerry F, Pineda V, Rocci L, Daviet L. (2012). Toward a biosynthetic route to sclareol and amber odorants. *J Am Chem Soc* 134: 18900-18903.
- Schepmann HG, Pang J, Matsuda S. (2001). Cloning and Characterization of *Ginkgo biloba* Levopimaradiene Synthase, Which Catalyzes the First Committed Step in Ginkgolide Biosynthesis. *Arch Biochem Biophys* 392(2): 263-269.
- Schillmiller AL, Schauvinhold I, Larson M, Xu R, Charbonneau AL, Schmidt A, Wilkerson C, Last RL, Pichersky E. (2009). Monoterpenes in the glandular trichomes of tomato are synthesized from a neryl diphosphate precursor rather than geranyl diphosphate. *Proc Natl Acad Sci USA* 106(26):10865-10870.
- Schnee C, Köllner TG, Gershenzon J, Degenhardt J. (2002). The maize gene terpene synthase 1 encodes a sesquiterpene synthase catalyzing the formation of (E)- $\beta$ -farnesene, (E)-nerolidol, and (E, E)-farnesol after herbivore damage. *Plant physiol* 130(4): 2049-2060.
- Smith MW, Yamaguchi S, Ait-Ali T, Kamiya Y. (1998). The first step of gibberellin biosynthesis in pumpkin is catalyzed by at least two copalyl diphosphate synthases encoded by differentially regulated genes. *Plant physiol* 118(4): 1411-1419.
- Spielmeyer W, Ellis M, Robertson M, Ali S, Lenton JR, Chandler PM. (2004). Isolation of gibberellin metabolic pathway genes from barley and comparative mapping in barley, wheat and rice. *Theor Appl Genet* 109(4): 847-855.
- Sugai Y, Ueno Y, Hayashi K, Oogami S, Toyomasu T, Matsumoto S, Natsume M, Nozaki H, Kawaide H. (2011). Enzymatic <sup>13</sup>C labeling and multidimensional NMR analysis of miltiradiene synthesized by bifunctional diterpene cyclase in *Selaginella moellendorffii*. *J Biol Chem* 86(50): 42840-42847.
- Sun TP, Kamiya Y. (1994). The Arabidopsis GA1 locus encodes the cyclaseent –kaurene synthetase A of gibberellin biosynthesis. *Plant Cell* 6(10): 1509-1518.
- Tuskan GA, Difazio S, Jansson S, Bohlmann J, Grigoriev I, Hellsten U, Putnam N, Ralph S, Rombauts S, Salamov A, et al. (2006).The genome of black cottonwood, *Populus trichocarpa* (Torr. & Gray) *Science* 313 (5793):1596-1604.
- Vogel BS, Wildung MR, Vogel G, Croteau R. (1996). Abietadiene synthase from grand fir (*Abies grandis*) cDNA isolation, characterization, and bacterial expression of a bifunctionalditerpenecyclase involved in resin acid biosynthesis. *J Biol Chem* 271(38): 23262-23268.

- Wilderman PR, Xu M, Jin Y, Coates RM, Peters RJ. (2004). Identification of *syn*-pimara-7, 15-diene synthase reveals functional clustering of terpene synthases involved in rice phytoalexin/allelochemical biosynthesis. *Plant Physiol* 135(4): 2098-2105.
- Wildung MR, Croteau R. (1996). A cDNA clone for taxadiene synthase, the diterpenecyclase that catalyzes the committed step of taxol biosynthesis. *J Biol Chem* 271(16): 9201-9204.
- Xu MM, Hillwig ML, Pristic S, Coates RM, Peters RJ. (2004). Functional identification of rice *syn*-copalyl diphosphate synthase and its role in initiating biosynthesis of diterpenoid phytoalexin/allelopathic natural products. *Plant J* 39(3): 309-318.
- Xu MM, Wilderman PR, Morrone D, Xu J, Roy A, Margis-Pinheiro M, Upadhyaya NM, Coates RM, Peters RJ. (2007). Functional characterization of the rice kaurene synthase-like gene family. *Phytochemistry* 68 (3): 312-326.
- Yamaguchi S, Saito T, Abe H, Yamane H, Murofushi N, Kamiya Y. (1996). Molecular cloning and characterization of a cDNA encoding the gibberellin biosynthetic enzyme *ent*-kaurene synthase B from pumpkin (*Cucurbita maxima* L.). *Plant J* 10(2): 203-213.
- Yamaguchi S, Sun TP, Kawaide H, Kamiya Y. (1998). The GA2 Locus of *Arabidopsis thaliana* encodes *ent*-kaurene synthase of gibberellin biosynthesis. *Plant Physiol* 116(4): 1271-1278.
- Zerbe P, Chiang A, Yuen M, Hamberger B, Hamberger B, Draper JA, Bohlmann J. (2012). Bifunctional cis-abienol synthase from *Abies balsamea* discovered by transcriptome sequencing and its implications for diterpenoid fragrance production. *J Biol Chem* 287(15): 12121-12131.
- Zerbe P, Hamberger B, Yuen M, Chiang A, Sandhu H, Madilao L, Nguyen A, Hamberger B, Bach SS, Bohlmann J. (2013). Gene discovery of modular diterpene metabolism in nonmodel systems. *Plant Physiol* 162:1073-1091.
- Zerbe P, Chiang A, Dullat H, O'Neil-Johnson M, Starks C, Hamberger B, Bohlmann J. (2014). Diterpene synthases of the biosynthetic system of medicinally active diterpenoids in *Marrubium vulgare*. *Plant J* 79(6):914-27.
- Zerbe P, Rodriguez SM, Mafu S, Chiang A, Sandhu H K., O'Neil-Johnson M, Starks CM and Bohlmann J. (2015). Exploring diterpene metabolism in non-model species: transcriptome-enabled discovery and functional characterization of labda-7,13E-dienyl diphosphate synthase from *Grindelia robusta*. *The Plant J.* 83: 783-793.

**Table S6.** Primers used in this study

| Name                                                             | Sequence(5'to 3')                     |
|------------------------------------------------------------------|---------------------------------------|
| <b>RACE primer</b>                                               |                                       |
| IrCPS2-5'-RACE1                                                  | TGCCACATAATCCTCTCTTGTGTTTCG           |
| IrCPS2-5'-RACE2                                                  | CCGTTCTCAGTCCACACGTTATTGATGTGA        |
| IrCPS5-5'-RACE                                                   | AGGCCTGCCATTTCCTTCCAAGCTATG           |
| IrKSL2-5'-RACE                                                   | GGATAGTCGAGAGCGTGCTTCACTACTG          |
| IrKSL2-3'-RACE3                                                  | TCCATTTCCTTACATATGAGGGACGTC           |
| IrKSL4-5'-RACE                                                   | TCCGTCCTCCGCCGACCCATTCTCGGTA          |
| IrKSL4-3'-RACE3                                                  | CTGTGAGGTTGGAGACAGAGCACACC            |
| IrKSL5-3'-RACE                                                   | TATCCAGAGGAAAGAGATCTGGACCA            |
| IrKSL5-5'-RACE                                                   | TATGTTGGTCCAGATCTCTTTCTCTGGA          |
| IrKSL6-5'-RACE                                                   | TTGGCGAGTCATGAGATCTTGGGCCGTC          |
| <b>qRT-PCR primers for gene expression</b>                       |                                       |
| IrCPS1F                                                          | CCACATTGCTTTCAGAGAAGAAAT              |
| IrCPS1R                                                          | TTAATACTAGTTTCCGCGGTCATCT             |
| IrCPS2F                                                          | GGTCATATTGCCTTCAACGAAGAC              |
| IrCPS2R                                                          | TCCTTATCTTTTATGCTCCCATCCT             |
| IrCPS3F                                                          | ATAGATGCCAAGAACAACATCAGA              |
| IrCPS3R                                                          | TTTACCGGGTTGGCCGGCAATGT               |
| IrCPS4F                                                          | CGGTTGGCTTGGGCTATAACAGCA              |
| IrCPS4R                                                          | TGCTTCTCCTAAATCATCATCACC              |
| IrCPS5F                                                          | TCGTGATGCAGCTCGTTTCTCTGCC             |
| IrCPS5R                                                          | CATCGTCATCACCGCCGTAAGTGT              |
| IrKSL1F                                                          | TAACAGGAGACAACCTGATGCAGA              |
| IrKSL1R                                                          | TTTGCCAACCACATTGTTAGC                 |
| IrKSL2F                                                          | CGTGTTGTCGTCTTCTAAATGA                |
| IrKSL2R                                                          | ATCAATTCTCTCCTTTGCCTCT                |
| IrKSL3F                                                          | ATGATCTCAAGACCTACAGCAGAG              |
| IrKSL3R                                                          | CCTTGCAGGTCTTCCACACCAGCTCCT           |
| IrKSL4F                                                          | TAACAGGAGACAACCTGATGCAGA              |
| IrKSL4R                                                          | TTTGCCAACCACATTGTTAGC                 |
| IrKSL5F                                                          | CGTGTTGTCGTCTTCTAAATGA                |
| IrKSL5R                                                          | ATCAATTCTCTCCTTTGCCTCT                |
| IrKSL6F                                                          | ATGATCTCAAGACCTACAGCAGAG              |
| IrKSL6R                                                          | CCTTGCAGGTCTTCCACACCAGCTCCT           |
| IractinF                                                         | ATGGAGCCTCCAATCCAGACACTGT             |
| IractinR                                                         | ATTCCGTTGCCCTGAGGTGCTCTT              |
| <b>Full length cloning primers for <i>E. coli</i> expression</b> |                                       |
| IrCPS1F                                                          | GGATCCATGGCCAGCCTGAGTAC               |
| IrCPS1R                                                          | CTCGAGTTAAACCACAGGTTTCGAA             |
| IrCPS2F+NotI                                                     | TTGCGGCCGCATGACCTCTATGTCATCATCTCTAAAC |
| IrCPS2R+XhoI                                                     | CCCTCGAGTCATACTGTTCAAATAGTACTTTG      |
| IrCPS3F+BamHI                                                    | CGGGATCCATGGATGATAATTATCGTATTTTC      |

|                                                      |                                       |
|------------------------------------------------------|---------------------------------------|
| IrCPS3R+NotI                                         | ATTTGCGGCCGCCTACACAAGCTGCTCAAATAGTATA |
| IrCPS4F                                              | ATGAGCAGCAGCAGCAATGTG                 |
| IrCPS4R                                              | TTAGTCAATTTTTTCGAACAGCAC              |
| IrCPS5F+BamHI                                        | CGGGATCCATGTCTATTGCTTCCACCGTCTC       |
| IrCPS5R+NotI                                         | TTGCGGCCGCTCAGAGTACTTTTTCAAAGAGCAC    |
| IrKSL1F                                              | ATGAGCTTAGCCTTCAATCTGCG               |
| IrKSL1R                                              | CTCGAGTTAGTTGCTAACACAACCTC            |
| IrKSL2F+BamHI                                        | CGGGATCCATGTCTCTTCTGCTCTCCAATTCTG     |
| IrKSL2R+XhoI                                         | CCCTCGAGTTAATTGAGAAGAATAGGGTCGTG      |
| IrKSL3F+BamHI                                        | CGGGATCCATGTCTACTCTCAAACCTAATCCCCTTC  |
| IrKSL3R+NotI                                         | TTGCGGCCGCTAATGAGTTGAAAGATGAGGAAGGC   |
| IrKSL4F+BamHI                                        | CGGGATCCATGTCTCTTATTCTCTCCTCTTTCC     |
| IrKSL4R+XhoI                                         | CCCTCGAGTTAGAAGTGGTTGAGGAGAATAGGT     |
| IrK5F+BamHI                                          | CGGGATCCATGTCTCTTCTGCTCTCCAATTCTG     |
| IrKSL5R+XhoI                                         | CCCTCGAGTCAA AATTGATTTAAGACAATCGGT    |
| IrKSL6F+BamHI                                        | CGGGATCCATGTTTTCTTCGAGTCTAAAACCTCAA   |
| IrKSL6R+XhoI                                         | CCCTCGAGTTAAGGAGTTGTTTTCAATACTGGA     |
| Full length cloning primers for yeast identification |                                       |
| IrCYP76AH30+BamHI                                    | CGGGATCCATGGAAACCATTGCTCTTCTC         |
| IrCYP76AH30+Sall                                     | GCGTCGACTCATGGCCTAAGTGGGAATGATCT      |
